# Supplementary material for: Early-adult methionine restriction reduces methionine sulfoxide and extends lifespan in Drosophila
Source: PubMed Central journal article supplement (PMC10698029; doi:10.1038/s41467-023-43550-2), 2023-12-05
Supplement: 41467_2023_43550_MOESM1_ESM.pdf [file 41467_2023_43550_MOESM1_ESM.pdf]

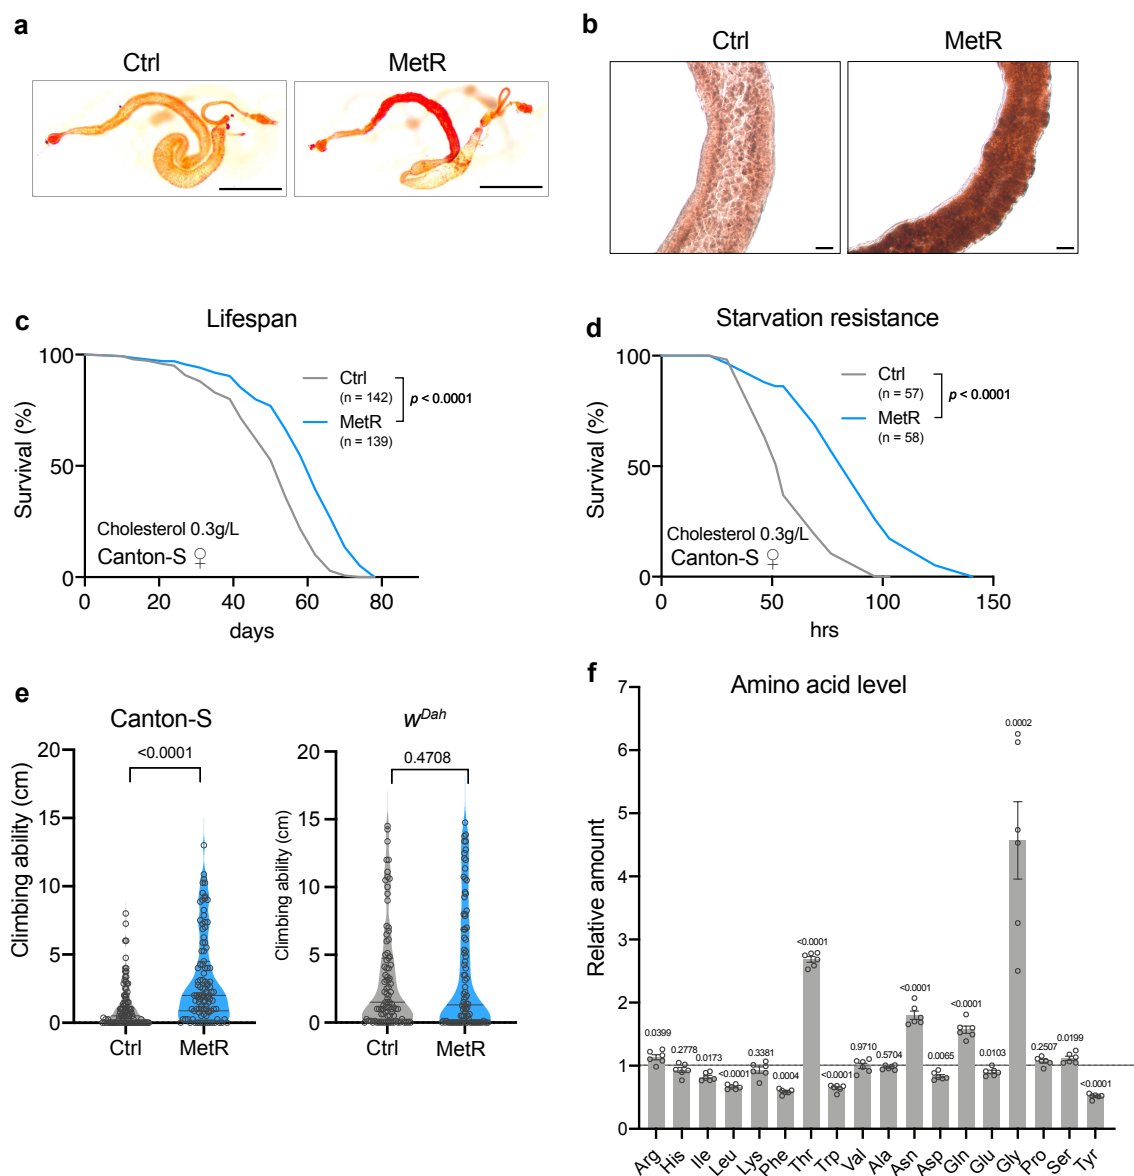

### Supplementary Fig. 1 Phenotypic analysis of methionine-restricted flies.

**a, b**, Oil red O staining of female guts of Canton-S flies fed with or without a methionine-restricted diet for nine days. Whole gut (**a**) or magnified view of the anterior midgut (**b**). Scale bar: 1 mm (**a**), or 100  $\mu$ m (**b**). **c**, Lifespans of female Canton-S flies fed with or without a methionine-restricted diet that contained three times as much cholesterol. Sample sizes (n) are shown in the figure. For the statistics, a log-rank test was used. **d**, Survivability of female Canton-S flies upon complete starvation after feeding with or without a methionine-restricted diet that contained three times as much cholesterol for a week. Sample sizes (n) are shown in the figure. For the statistics, a log-rank test was used.

**e**, Climbing abilities of female Canton-S or  $w^{Dah}$  flies fed with or without a methionine-restricted diet for four weeks. **f**, Quantification of amino acids other than methionine in female  $w^{Dah}$  flies upon methionine restriction. The relative amount of each amino acid upon methionine restriction compared to the control diet is shown.  $n = 6$ . For the statistics, a two-tailed Student's  $t$  test was used. For the graph, the mean and SEM are shown. Data points indicate biological replicates. Source data are provided as a Source Data file.

**a**

GO term "determination of adult lifespan"

| Gene Name                                                 | baseMean | log2 fold change |
|-----------------------------------------------------------|----------|------------------|
| dawdle(daw)                                               | 195      | 2.15             |
| CG8846 gene product from transcript CG8846-RA(Thor/4E-BP) | 12164    | 2.09             |
| Methionine sulfoxide reductase A (MsrA)                   | 1529     | 2.06             |
| Peptidoglycan recognition protein LF(PGRP-LF)             | 42       | 1.90             |
| period(per)                                               | 568      | 1.85             |
| midkine and pleiotrophin 1(miple1)                        | 21       | 1.48             |
| CG10383 gene product from transcript CG10383-RB(CG10383)  | 1750     | 1.15             |
| bunched(bun)                                              | 6576     | 0.99             |
| puckered(puc)                                             | 1544     | 0.94             |
| Death regulator Nedd2-like caspase(Dronc)                 | 253      | 0.75             |
| pointed(pnt)                                              | 667      | 0.71             |
| CG42663 gene product from transcript CG42663-RB(CG42663)  | 639      | 0.64             |
| Histone deacetylase 1(HDAC1)                              | 546      | -0.61            |
| Coenzyme Q biosynthesis protein 2(Coq2)                   | 141      | -0.76            |
| Phosphoribosylamidotransferase(Prat)                      | 254      | -0.77            |
| Catalase(Cat)                                             | 13162    | -0.80            |
| CG31148 gene product from transcript CG31148-RA(CG31148)  | 3351     | -0.93            |
| Heat shock protein 68(Hsp68)                              | 90       | -1.89            |

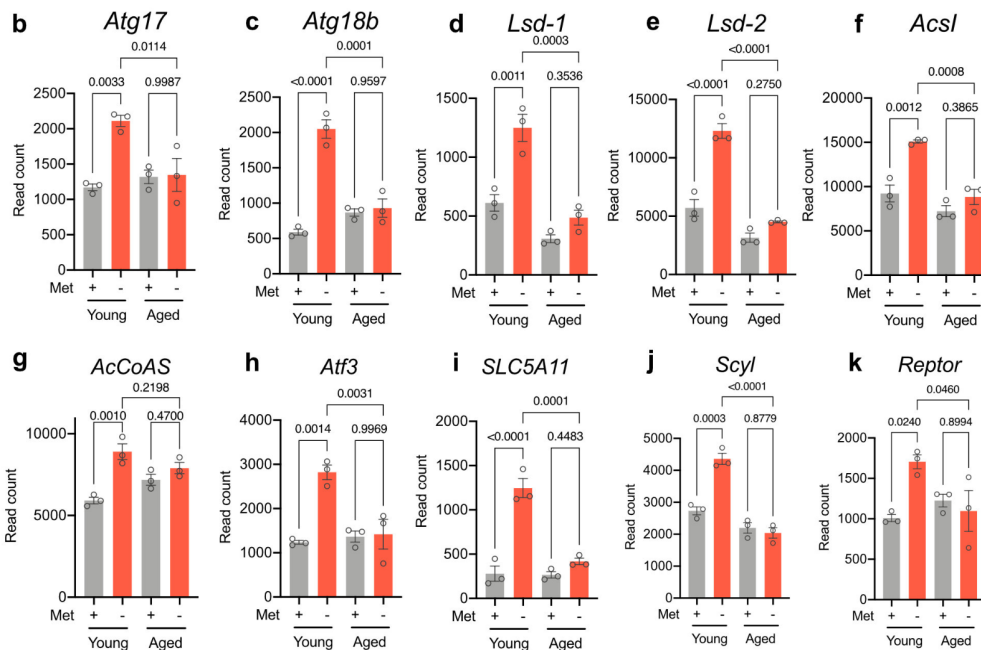

## Supplementary Fig. 2 Transcriptomic responses to methionine restriction in young and aged flies.

**a**, List of genes termed “determination of adult lifespan” by Gene Ontology analysis. **B-k**, Read counts of genes induced by methionine restriction at a young age from the RNAseq analysis. N = 3. For the statistics, one-way ANOVA with Holm-Šídák’s multiple comparison test was used. For all graphs, the mean and SEM are shown. Data points indicate biological replicates. Source data are provided as a Source Data file.

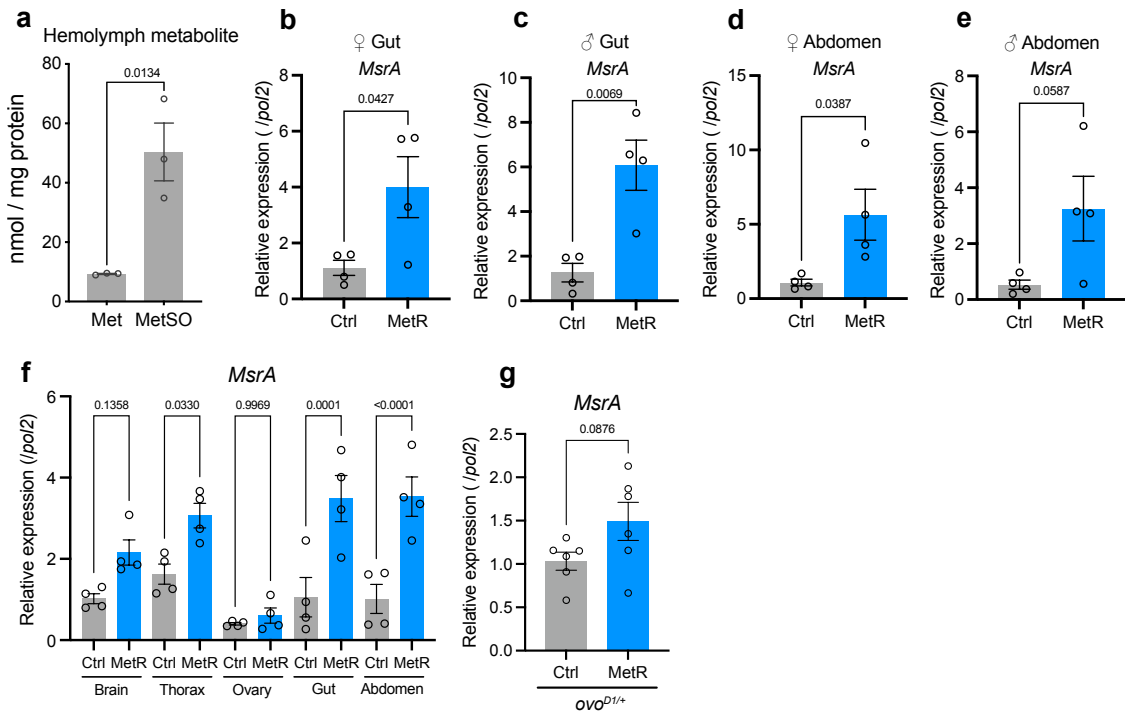

### Supplementary Fig. 3 *MsrA* induction upon methionine restriction.

**a**, Quantification of Met and MetSO in the hemolymph of female Canton-S flies that were fed with a standard yeast-based diet for four days post-eclosion.  $n = 3$ . For the statistics, a two-tailed Student's  $t$  test was used. **b-e**, Quantitative RT-PCR analysis of *MsrA* expression levels in female guts (**b**), male guts (**c**), female abdomens (**d**) and male abdomens (**e**) of Canton-S flies fed with or without a methionine-restricted diet for three days.  $n = 4$ . For the statistics, a two-tailed Student's  $t$  test was used. **f**, Quantitative RT-PCR analysis of *MsrA* expression in various tissues of female Canton-S flies fed with or without a methionine-restricted diet for three days.  $n = 4$ . For the statistics, one-way ANOVA with Holm-Šidák's multiple comparison test was used. **g**, Quantitative RT-PCR analysis of *MsrA* expression in female guts of *ovo<sup>D1/+</sup>* fed with or without a methionine-restricted diet for three days.  $n = 6$ . For the statistics, a two-tailed Student's  $t$  test was used. For all graphs, the mean and SEM are shown. Data points indicate biological replicates. Source data are provided as a Source Data file.



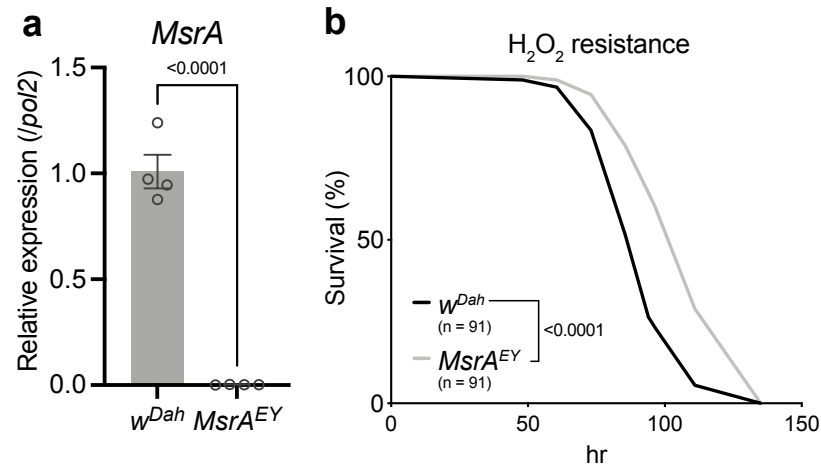

**Supplementary Fig. 4 Characterisation of the *MsrA* mutant.**

**a**, Quantitative RT-PCR analysis of *MsrA* in the whole bodies of *w<sup>Dah</sup>* or *MsrA<sup>EY05753</sup>* flies.  $n = 4$ . For the statistics, a two-tailed Student's *t* test was used. **B**, Survivability of female flies of *w<sup>Dah</sup>* or *MsrA<sup>EY05753</sup>* upon 3%  $H_2O_2$  treatment. Sample sizes ( $n$ ) are shown in the figure. For the statistics, a log-rank test was used. For the graph, the mean and SEM are shown. Data points indicate biological replicates. Source data are provided as a Source Data file.

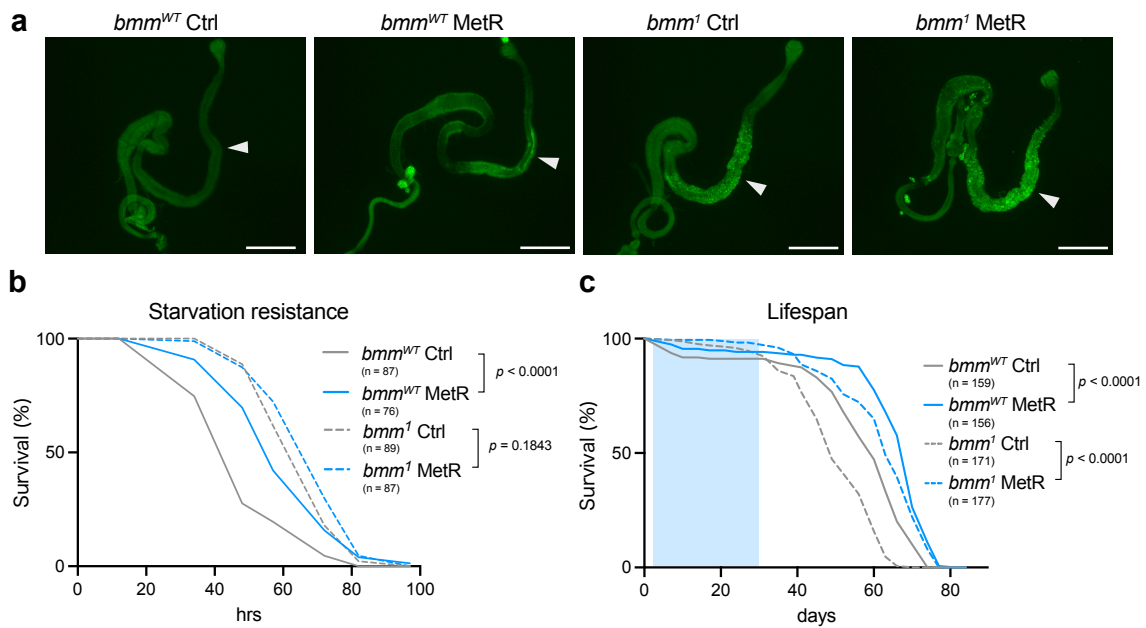

**Supplementary Fig. 5 Contribution of lipid metabolism to lifespan extension upon methionine restriction.**

**a**, Lipid staining of the female guts of *bmm*<sup>wt</sup> and *bmm*<sup>l</sup> flies fed with or without a methionine-restricted diet for one week using LipixTOX. Scale bar: 1 mm. Arrowheads indicate lipid accumulation. **b**, Survivability of female *bmm*<sup>wt</sup> and *bmm*<sup>l</sup> flies upon complete starvation after feeding with or without a methionine-restricted diet for one week. Sample sizes (n) are shown in the figure. For the statistics, a log-rank test was used. **c**, Lifespans of female flies of *bmm*<sup>WT</sup> and *bmm*<sup>l</sup> fed with or without a methionine-restricted diet in early life. Sample sizes (n) are shown in the figure. For the statistics, a log-rank test was used. Source data are provided as a Source Data file.

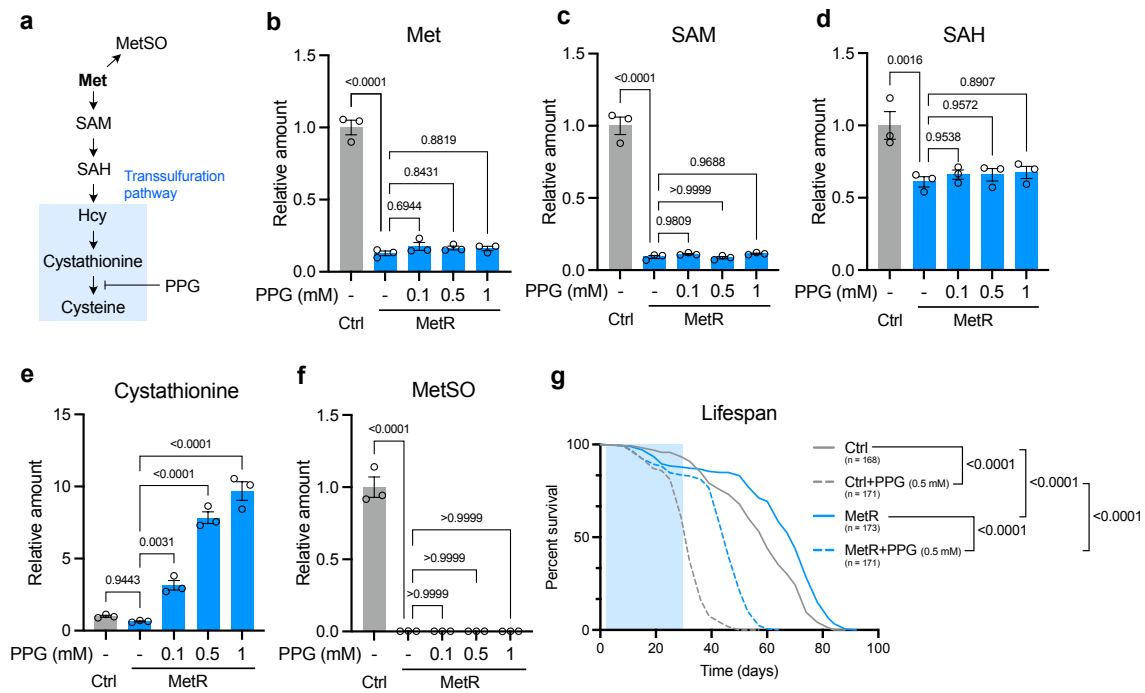

**Supplementary Fig. 6 Inhibition of Transsulfuration pathway did not abrogate lifespan extension upon methionine restriction.**

**a**, Methionine metabolic and transsulfuration pathways, which can be inhibited by propargylglycine (PPG). **b-f**, Quantification of methionine metabolites and their oxidative products upon methionine restriction.  $n = 3$ . For the statistics, one-way ANOVA with Holm-Šidák's multiple comparison test was used. **g**, Lifespans of female Canton-S flies fed with or without a methionine-restricted diet supplemented with 0.5 mM PPG. Sample sizes ( $n$ ) are shown in the figure. For the statistics, a log-rank test was used. For all graphs, the mean and SEM are shown. Data points indicate biological replicates. Source data are provided as a Source Data file.

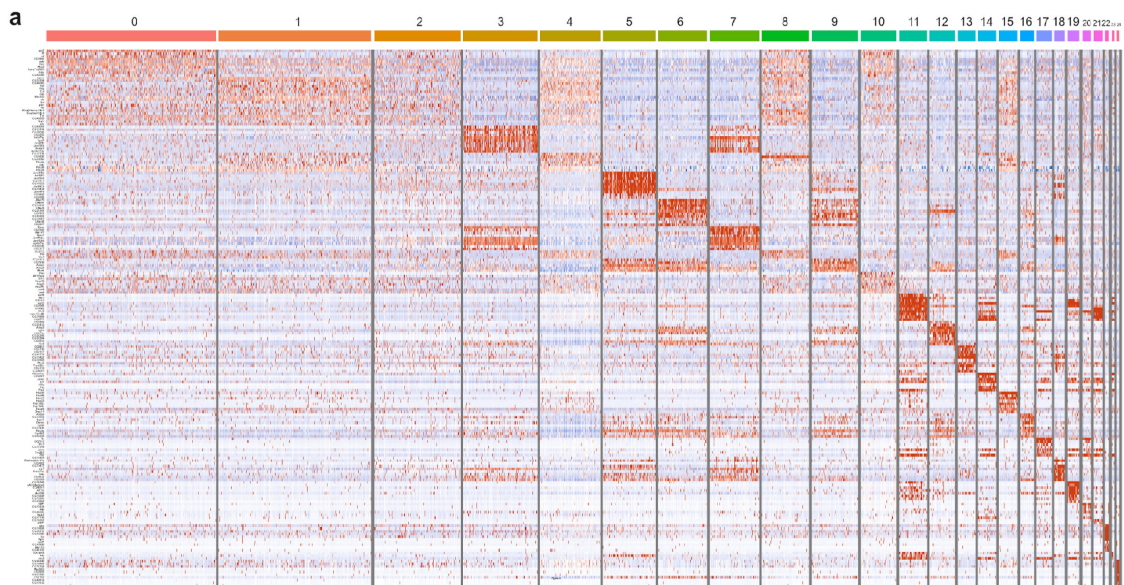

**b**

| Cluster | Cell type        | Key genes               |
|---------|------------------|-------------------------|
| 0       | EB/ISC           | DI, Tet, esg            |
| 1       | EB1              | klu, esg, Tet           |
| 2       | EB2              | klu, esg, Tet           |
| 3       | aEC1             | alphaTry, betaTry       |
| 4       | EB3              | klu, esg, Tet           |
| 5       | LFC              | mag, CG10472, Jon99Fii  |
| 6       | pEC1             | LManV, LManVI           |
| 7       | aEC2             | alphaTry, betaTry, Bace |
| 8       | EB4              | klu, esg, Tet           |
| 9       | pEC2             | LManVI                  |
| 10      | ISC              | DI, HmgD, hoip, Awd     |
| 11      | AstA-EE          | AstA, AstC, CCHa1       |
| 12      | pEC3             | nub, Gs2, zetaTry       |
| 13      | mEC              | Vha16-1, Vha13, CG5767  |
| 14      | Orcokinin-EE1    | Orcokinin, AstC, IA-2   |
| 15      | EB5              | klu, esg, Tet           |
| 16      | pEC4             | nub, Npc2e              |
| 17      | IA-2/Tk-EE       | IA-2, Tk, DH31          |
| 18      | copper/iron cell | MtnD, CG5399            |
| 19      | AstC-EE          | AstC, CCHa2             |
| 20      | NPF-EE           | NPF, IA-2               |
| 21      | CCHa2-EE         | CCHa2, IA-2             |
| 22      | unknown          | whe, CG34212            |
| 23      | Orcokinin-EE2    | Orcokinin, AstC, IA-2   |
| 24      | cardia           | Pgant4, Muc68D          |

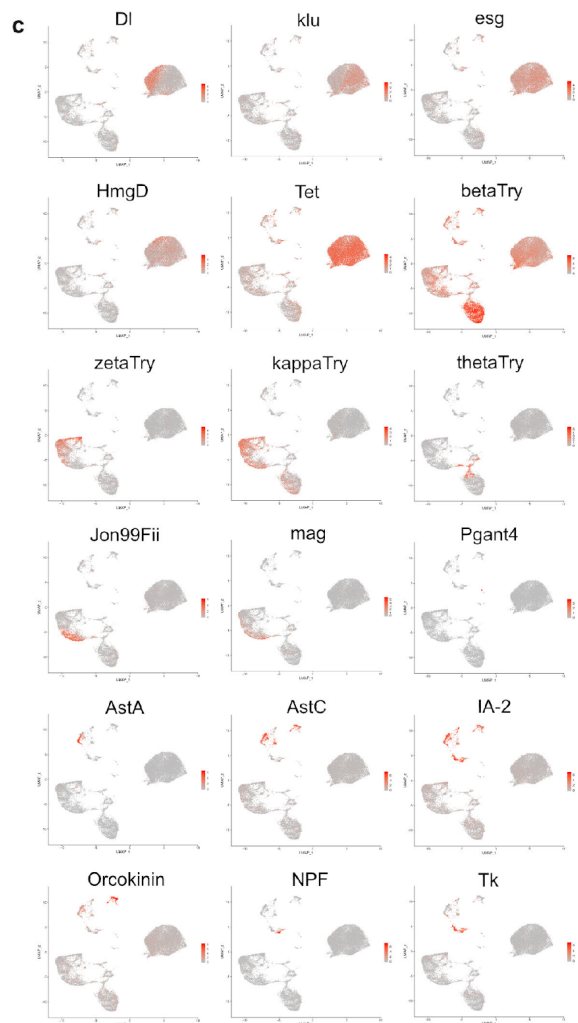

**Supplementary Fig. 7 Cell type clustering analysis and marker gene expression in each cluster.**

**a**, Heatmap of clustered marker genes from the results of single-cell RNAseq of the *Drosophila* female midgut. **b**, Cell type names in clusters. **c**, UMAP plot of characteristic marker genes.

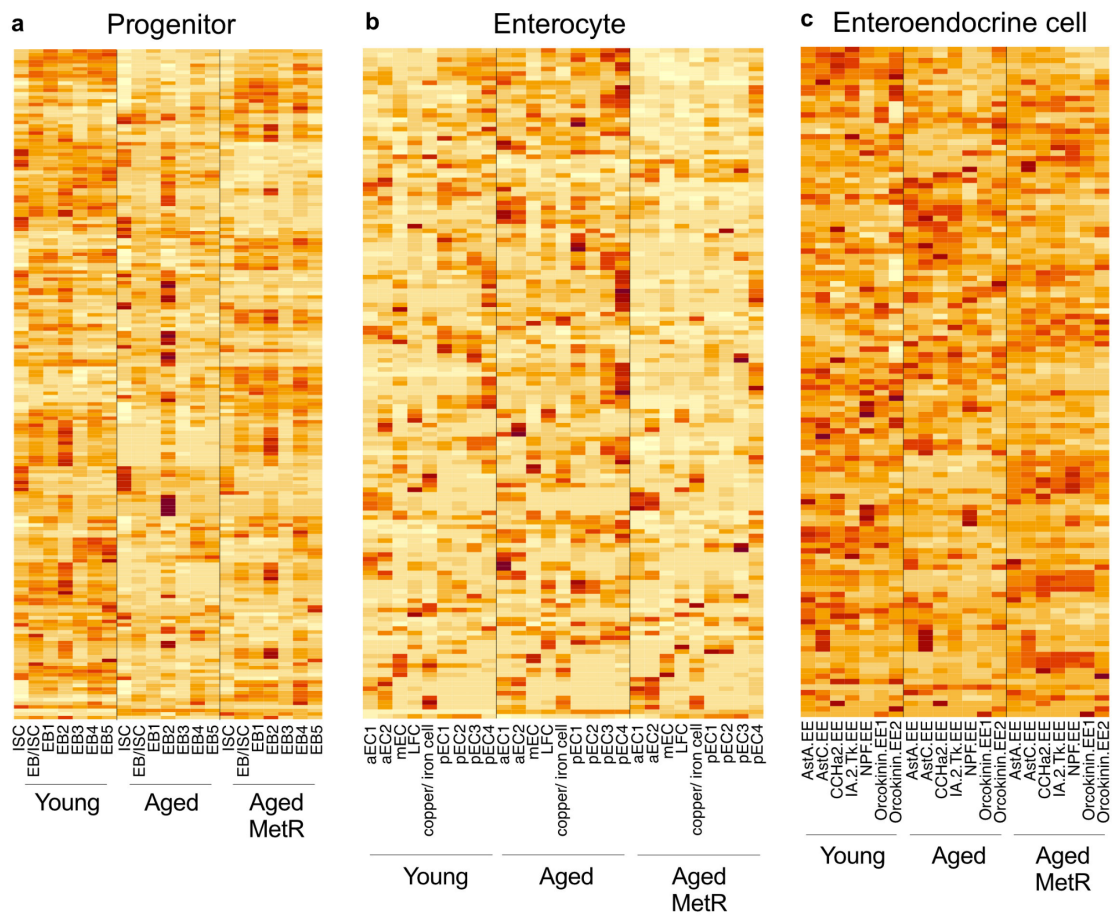

**Supplementary Fig. 8 Heatmap analysis of DEGs from single-cell RNAseq.**

**a-c,** Heatmap of DEGs in each cell type classified as progenitor cells (**a**), enterocytes (**b**), and enteroendocrine cells (**c**) upon methionine restriction with ageing. Source data are provided as a Source Data file.

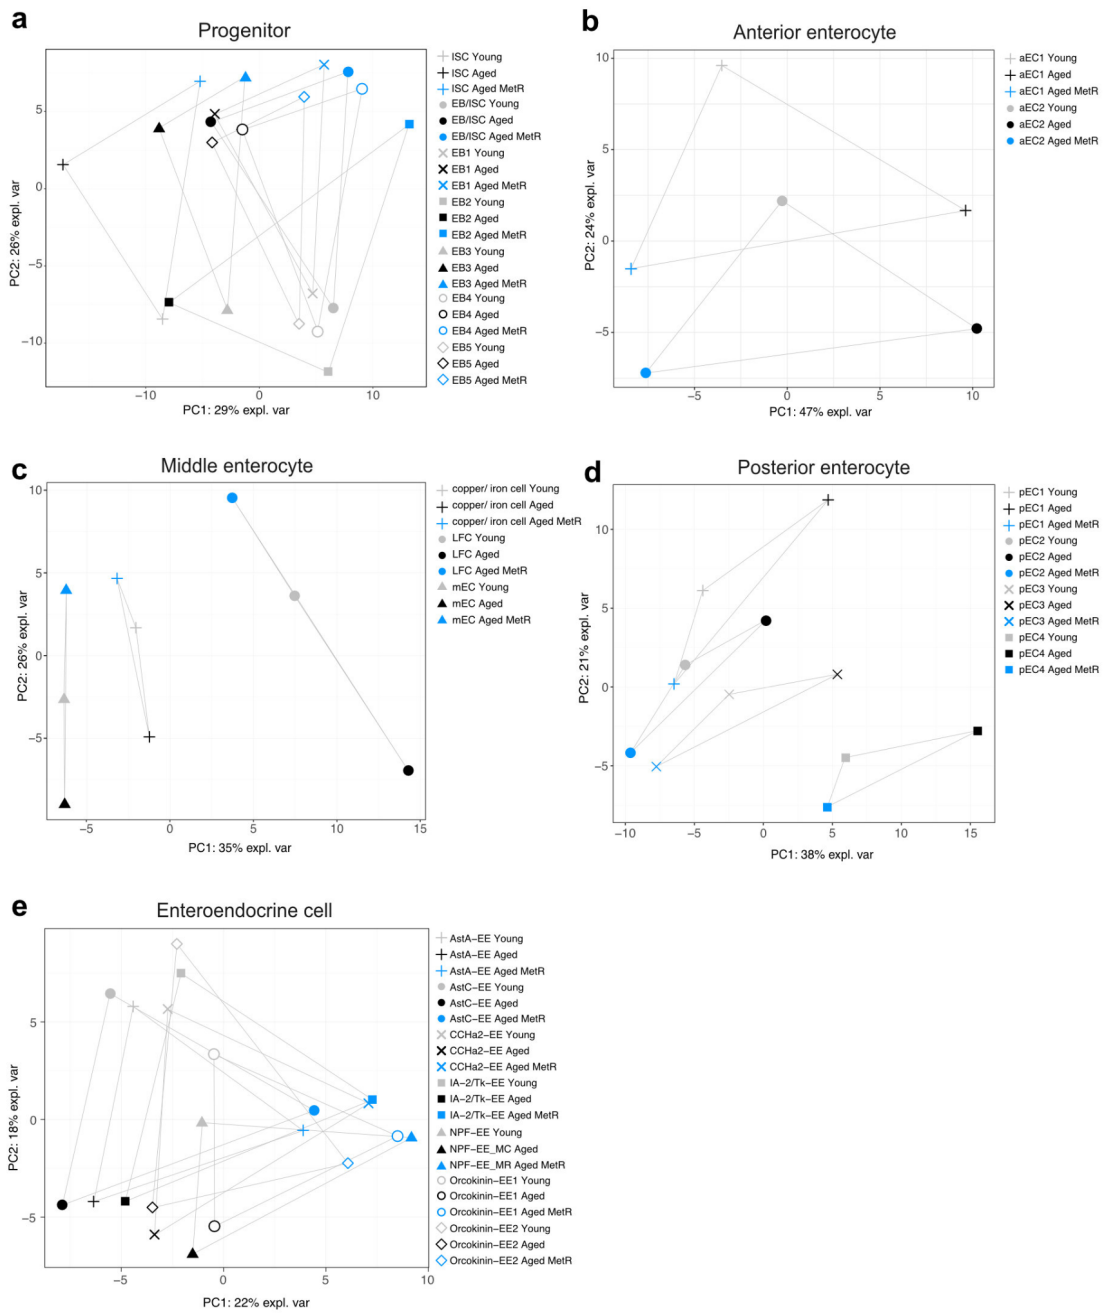

**Supplementary Fig. 9 PCA of single-cell RNaseq results upon methionine restriction.**

**a-e**, PCA of DEGs in each cell type classified as progenitor cells (**a**), anterior enterocytes (**b**), middle enterocytes (**c**), posterior enterocytes (**d**), and enteroendocrine cells (**e**) upon methionine restriction with ageing.

**Supplementary Table 1. Cox PH analysis for  $w^{iso31}$  and  $w^{Dah}$  female flies.**

| <i>Dependent variable:</i>          |                   |                   |
|-------------------------------------|-------------------|-------------------|
|                                     | Age (days)        |                   |
|                                     | $w^{iso31}$       | $w^{Dah}$         |
|                                     | coefficient (SE)  | coefficient (SE)  |
| Timing of diet treatment            | -0.156 (0.125)    | -0.048 (0.119)    |
| MetR diet                           | -0.753*** (0.130) | -0.524*** (0.120) |
| Timing of diet treatment: MetR diet | 0.589*** (0.178)  | 0.191 (0.167)     |
| Observations                        | 528               | 576               |
| Score (Logrank) Test (df = 3)       | 38.854***         | 27.841***         |

\*\*\*  $p < 0.001$ **Supplementary Table 2. Cox PH analysis for  $MsrA^{EY05753}$  flies compared to  $w^{Dah}$  flies.**

| <i>Dependent variable:</i>    |                   |
|-------------------------------|-------------------|
|                               | Age (days)        |
|                               | coefficient (SE)  |
| Genotype                      | -0.367*** (0.109) |
| MetR diet                     | -1.240*** (0.110) |
| Genotype: MetR diet           | 1.264*** (0.153)  |
| Observations                  | 703               |
| Score (Logrank) Test (df = 3) | 143.7***          |

\*\*\*  $p < 0.001$



**Supplementary Table 3. Cox PH analysis for *bmm*<sup>1</sup> flies compared to *bmm*<sup>WT</sup> flies.**

| <i>Dependent variable:</i>    |                   |
|-------------------------------|-------------------|
|                               | Age (days)        |
|                               | coefficient (SE)  |
| Genotype                      | 0.946*** (0.117)  |
| MetR diet                     | -0.790*** (0.116) |
| Genotype: MetR diet           | -0.695*** (0.160) |
| Observations                  | 663               |
| Score (Logrank) Test (df = 3) | 248***            |

\*\*\*  $p < 0.001$
