# Supplementary material for: Early-adult methionine restriction reduces methionine sulfoxide and extends lifespan in Drosophila
Source: PubMed Central journal article supplement (PMC10698029; doi:10.1038/s41467-023-43550-2), 2023-12-05
Supplement: 41467_2023_43550_MOESM3_ESM.pdf [file 41467_2023_43550_MOESM3_ESM.pdf]

### **Description of Additional Supplementary Files**

**Supplementary Data 1:** DEG list obtained by RNAseq analysis of young or aged gut after complete Met depletion

**Supplementary Data 2:** DEG list obtained by time-series 3'RNAseq analysis of gut after MetR

**Supplementary Data 3:** DEG list of each cell cluster obtained by single cell RNAseq analysis

**Supplementary Data 4:** Ingredients and procedures to make holidic medium

**Supplementary Data 5:** All mass spectrometry data

**Supplementary Data 6:** R code for Cox PH analysis
